# Supplementary material
Source: PubMed Central journal article supplement (PMC2724900)

Supplementary Figure 1. VCP was absent in neuronal vacuoles

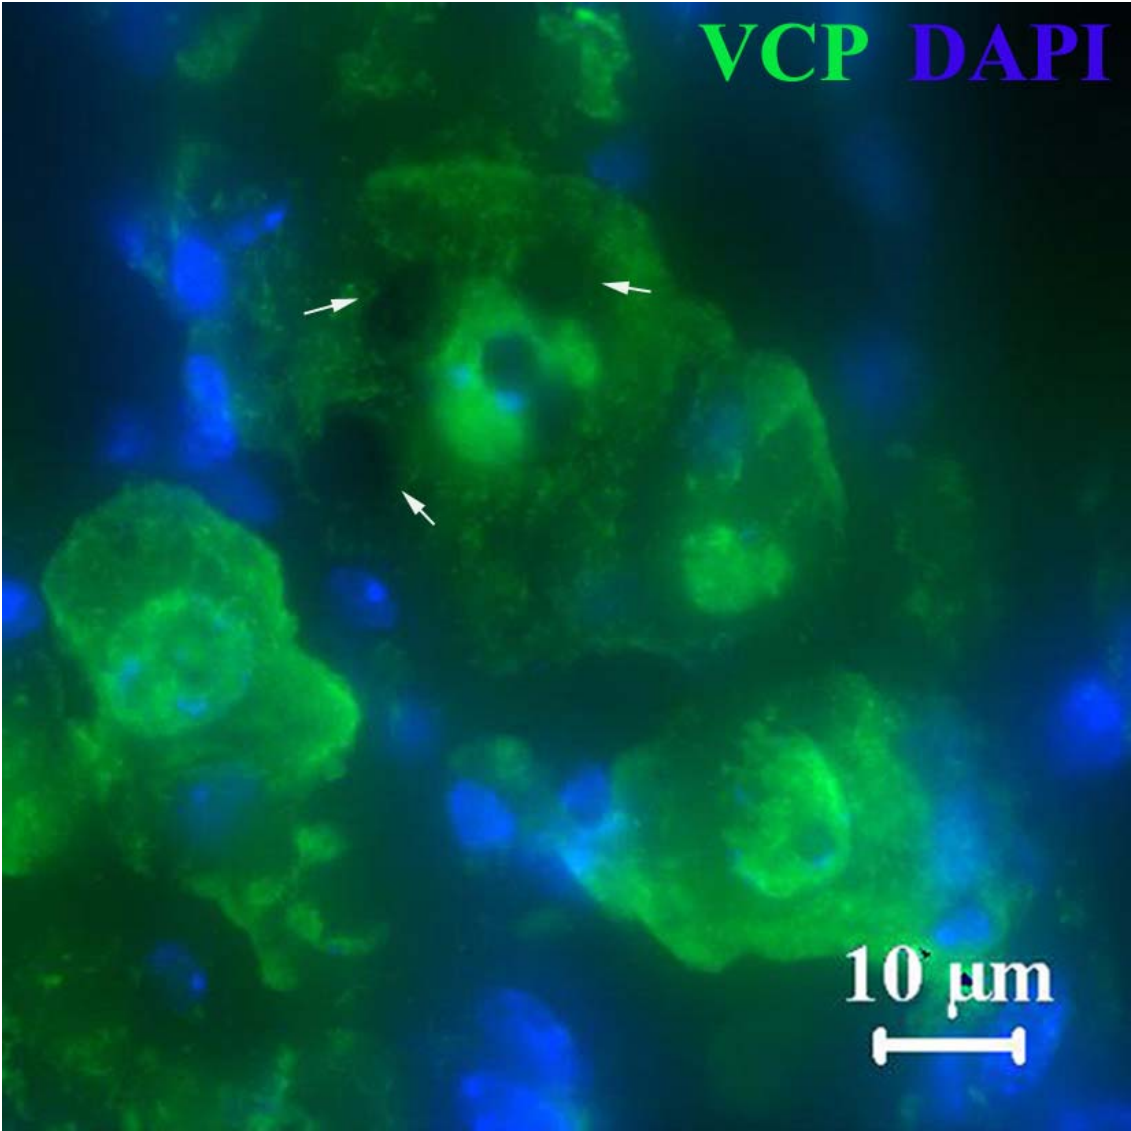

Supplementary Figure 2. Cholesterol was absent in neuronal vacuoles

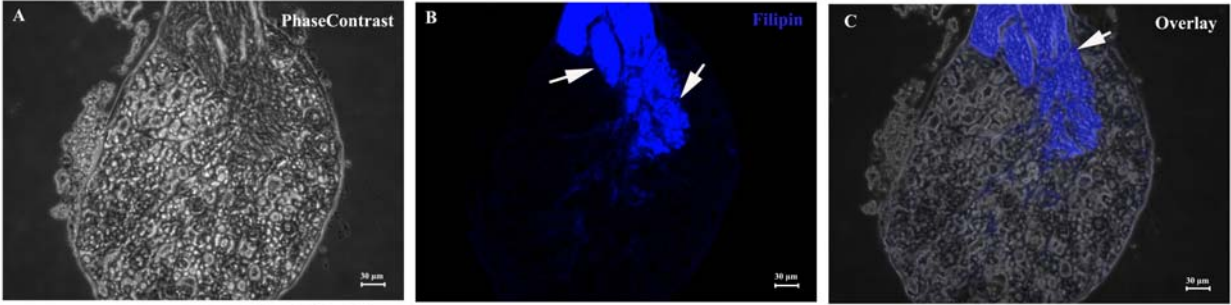

Supplementary Figure 3. Neuronal apoptosis was not increased in *plt* mice.

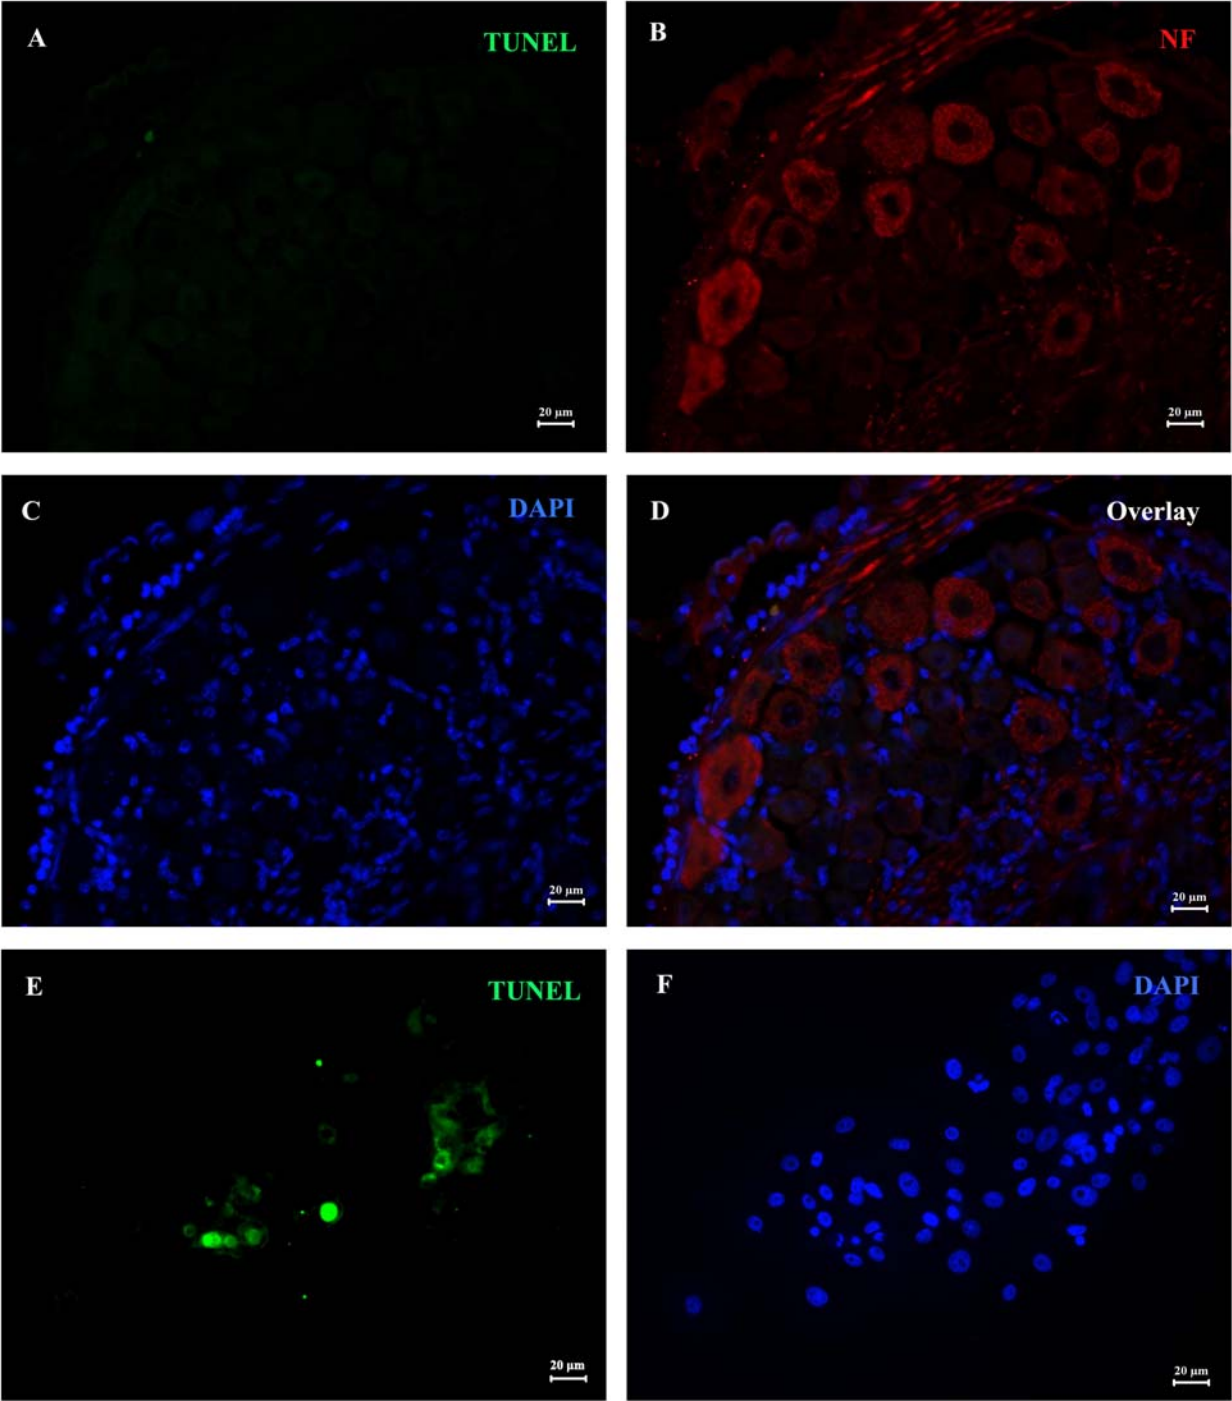

Supplementary Figure 4. Proliferation of cells was not increased in *plt* sciatic nerves.

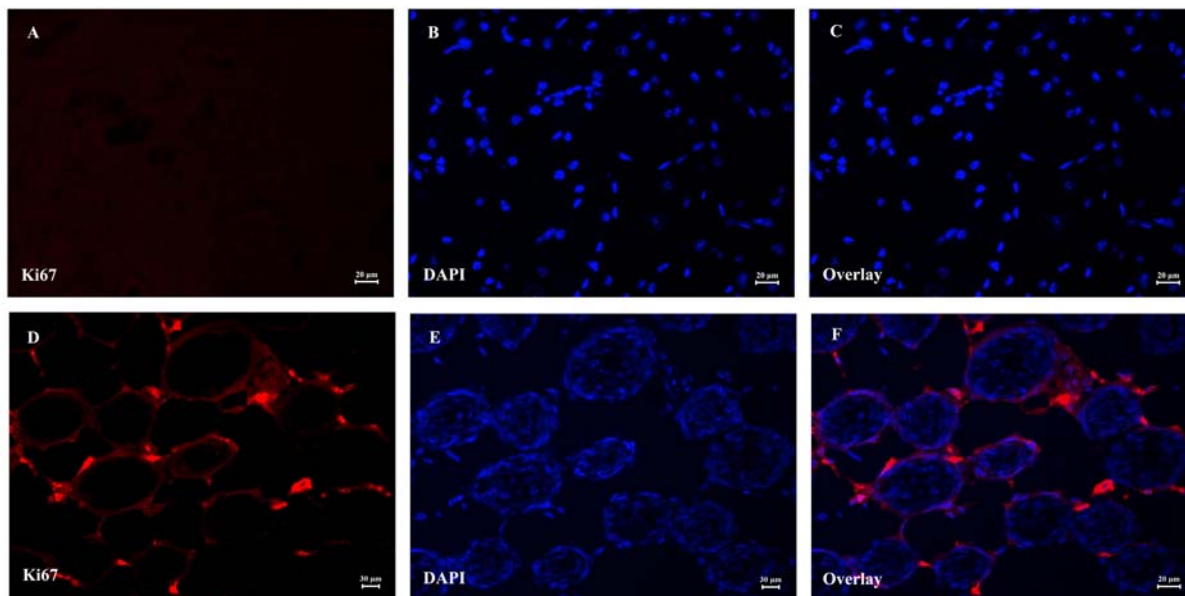

Supplementary Figure 5. Macrophages in *plt* nerves

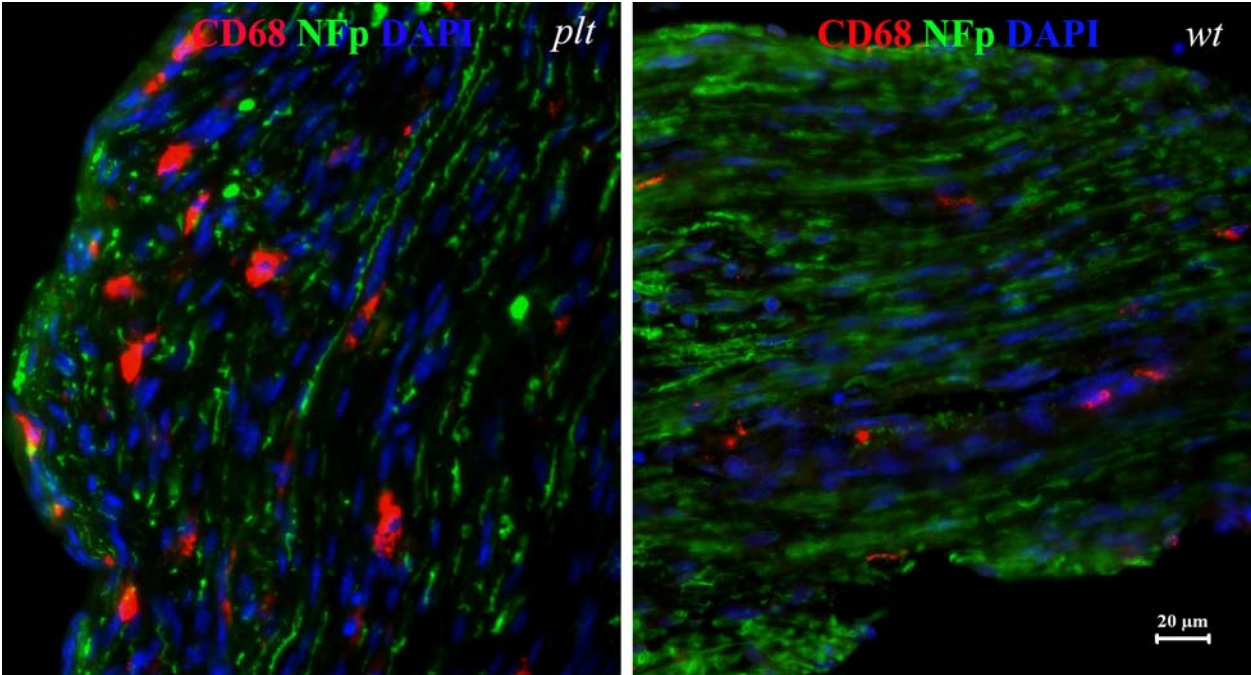

Supplement: awn114_1.pdf [file awn114_1.pdf]
